# Supplementary material for: Enantioselective Friedel–Crafts reaction of indoles with arylidene malonates catalyzed byiPr-bisoxazoline–Cu(OTf)2
Source: Royal Society of Chemistry journal article supplement (doi:10.1039/b313197a), 2004-01-01
Supplement: b313197a.doc [file b313197a.doc]

**Enantioselective Friedel-Crafts Reaction of Indoles with Arylidene Malonates Catalyzed by iPr-bisoxazoline/Cu(OTf)2**

Jian Zhou and Yong Tang*

(State Key Laboratory of Organometallic Chemistry, Shanghai Institute of Organic Chemistry,

Chinese Academy of Science, 200032 Shanghai, China)

# Supporting Information

### General Information

Cu(OTf)2 was purchased from TCI, Cu(ClO4)2·6H2O from Fluka, KOTf from Acros, Indole and substituted indoles from TCI or Acros. Alcohols were purchased from Aldrich and used without purification. Alkyl halides were purchased from Shanghai Reagents Company of Chinese Medical Corporation. Purification of reaction products was carried out by flash chromatography on silica gel. Ether was dried by distillation over sodium-benzophenone ketyl prior to use.

1,1,2,2-tetrachloroethane (TTCE) was purified as follows: TTCE (200 mL) was stirred with conc. H2SO4 at 80oC for about 10 minutes. Then the yellow acid layer was removed. This operation was repeated for several times until that conc. H2SO4 no longer turned yellow. The organic layer was washed successively by water, saturated NaHCO3 and saturated NaCl solution. The resulting white emulsion was dried over Na2SO4, distilled under reduced pressure over P2O5, then over CaH2, and stored under N2 for use. ***It should be noted that oil temperature should keep below 80oC during the course of distillation, to avoild the decomposition of 1,1,2,2-tetrachloroethane.***

**Ligand preparation:**

**N, N’-Bis[(2S)-3-methyl-1-hydroxybutyl]-2-methyl-1,3-propanediamide**

To diethyl methylmalonate(3.9 g, 22.0 mmol) was added L-valinol (5.77 g, 50.0 mmol). And the resulting mixture was stirred at 120oC for 10 hours. The mixture was cooled to room temperature and crystallized as pale yellow solid, which was recrystallized from ethyl acetate and ethanol to give the desired diamides as white solid (5.02 g，80% based on the amount of malonate). [α]D20= -39.4 (20.0 mg/2 mL EtOH); 1H NMR (300 MHz, CDCl3): δ0.86-0.93 (m, 12H); 1.46 (d, *J* = 6.9Hz, 3H), 1.72-1.82 (m, 2H), 3.32 (q, *J* = 7.2 Hz, 1H), 3.39-3.54 (m, 2H), 3.61-3.79 (m, 4H), 7.29 (d, *J* = 9.0 Hz, 1H), 7.44 (d, *J* = 9.3 Hz, 1H); 13C NMR (75 MHz, CDCl3): 172.93, 172.65, 63.00, 62.87, 56.90, 56.73, 48.60, 29.18, 29.06, 19.57, 19.45, 18.64, 18.45, 17.01. m.p. 138oC.

**1,1’-Bis[2-((4S)-(1-methylethyl)-1,3-oxazolinyl)]-2-methylethane 11,2**

To a solution of the above synthesized diamides (2.88 g, 10 mmol) and triethylamine (7 mL, 50 mmol) in 50 mL CH2Cl2 at 0 oC was added methanesulfonyl chloride (2.3 mL, 25 mmol) under N2. The solution was warmed to 25 oC and stirred for an additional two hours. The mixture was diluted with 20 mL of CH2Cl2 and poured onto 20 mL of saturated aqueous NH4Cl. The aqueous phase was extracted with CH2Cl2 (3 x 25 mL). The combined organic phase was concentrated to a yellow oil. To the crude bismesylate was added 25 mL of 0.5 M NaOH (water/MeOH, 1/1). The mixture was heated at reflux for three hours then was cooled to room temperature and was extracted with CH2Cl2 (3 x 25 mL). The combined organic layer was washed with saturated aqueous NaCl (52 mL), dried over anhydrous Na2SO4, and concentrated *in vacuo.* The residue was purified by flash chromatography on silica gel (CH2Cl2/ethyl acetate, 4/1, v/v) to afford pure **13** as lilac oil. Yield: 2.11 g (84%). [α]D20 = -117.0 (9.2 mg/2mL CHCl3) 1H NMR (300 MHz, CDCl3): δ0.88 (d, *J* = 6.9 Hz, 6H), 0. 93 (d, *J* = 6.9 Hz, 1H), 1.48 (d, *J* = 7.8 Hz, 3H), 1.70-1.82 (m, 2H), 3.53 (q, *J* = 6.9 Hz, 1H), 3.93 – 4.03 (m, 4H), 4.20-4.27 (m, 2H); 13C NMR (75 MHz, CDCl3): 165.52, 165.35, 71.69, 71.62, 70.10, 70.06, 33.91, 32.27, 32.24, 18.54, 18.50, 17.66, 17.56, 15.24.

**General Procedure A for the preparation of (+)-enantiomer in isobutanol.** Under air atomosphere, to a Schlenk tube was added Cu(OTf)2 (0.10 eq), followed by (*S*)–isopropyl–bisoxazoline **1** (0.10-0.11 eq). Then *i*BuOH was added, and the concentration of Cu2+ was maintained about 0.01 mol/mL. The resulting purple solution soon turned blue, and was stirred at room temperature (25oC) for two hours before arylidene malonate (1.0 eq) was added into the mixture. The resulting mixture was kept stirring at room temperature for 15 minutes, then cooled to –25 C and stirred for another 15 minutes before the indoles (1.2 eq) was added. After a period of time, the reaction mixture was concentrated under reduced pressure at room temperature, and the residue was purified by flash column chromatography on silica gel [eluted with CH2Cl2/petroleum ether (1/1, v/v) then pure CH2Cl2] to afford the desired product.

**General Procedure B for the preparation of (-)-enantiomer in TTCE or CH2Cl2.** Under N2 atomosphere, to a Schlenk tube was added Cu(OTf)2 (0.10 eq), followed by (*S*)–isopropyl–bisoxazoline **1** (0.10-0.11 eq). Then 1,1,2,2-tetrachloroethane was added. The concentration of Cu2+ was maintained about 0.02 mol/mL. The resulting blue solution, (if catalyst solution is green, TTCE needs to be repurified), was stirred at 25oC for 2 hours before arylidene malonate (1.0 eq) was added into the mixture. The resulting mixture was kept stirring at 25oC for 30 minutes until the mixture was clear. Then the reaction system was cooled to 0C and stirred for another 15 min before the indoles (1.2 eq) was added. The reaction mixture was quenched by silica gel when the reaction was conducted for a period of time. Purification by flash column chromatography on silica gel [eluted with CH2Cl2/petroleum ether (1/1, v/v), then pure CH2Cl2] afforded the desired product.

**Procedure for the study using KOTf as additive in TTCE.** In a Schlenk tube under N2 was added Cu(ClO4)2.6H2O (17.7 mg, 0.10 eq), KOTf (9.8 mg, 0.11 eq) and bisoxazoline **2c** (13.20 mg, 0.10-0.11 eq), then 2.5 mL of TTCE was added. The catalyst was stirred for two hours at 25oC before benzylidene malonate (118mg, 1.0 eq) was added to the catalyst solution and stirred for another 30 minutes. Then the resulted solution was cooled to 0oC and stirred for 15 minutes before indole (67 mg, 1.0 eq) was added. The reaction was stirred at 0oC for 20 hours and then quenched through a plug of silica gel. Purification by flash column chromatography on silica gel [eluted with CH2Cl2/petroleum ether (1/1, v/v), then pure CH2Cl2] afforded the desired product.

**Ethyl 2–ethoxycarbonyl–3–(3–indolyl)–3–phenyl propanoate (entry 1, Table 3)** 3

**(S)-enantiomer:** Prepared according to general procedure **A**: Cu(OTf)2 (8.4 mg), (S)-isopropyl-bisoxazoline 1 (6.4 mg), *i*BuOH (2.5 mL), indole (33 mg) and diethyl benzylidene malonate (58 mg) at –25oC for 60 hours to provide the pure product as a white solid. Yield: 64 mg (75%). HPLC analysis (Chiralcel OD-H, 15% iPrOH/hexanes, 0.75 mL/min, 254 nm; tr (minor) = 13.46 min, tr (major) = 15.77 min.) gave the isomeric composition of the product: 92.6% ee. [α]D20 = + 60.9 (22.0 mg/2 mL CHCl3). 1H NMR (300 MHz, CDCl3): δ 1.00 (m, 6H), 3.99 (m, 4H), 4.29 (d, *J* = 11.4 Hz, 1H), 5.08 (d, *J* = 11.7 Hz, 1H), 7.03-7.06 (m, 1H), 7.10-7.30 (m, 6H), 7.36 (d, *J* = 6.9 Hz, 2H), 7.55 (d, *J* = 7.8 Hz, 1H), 8.06 (brs, 1H).

**(R)-enantiomer:** Prepared according to general procedure **B**: Cu(OTf)2 (11.2 mg), (S)-isopropyl-bisoxazoline 1 (7.6 mg), dichloromethane (2.5 mL), indole (43 mg) and diethyl benzylidene malonate (77 mg) at 0oC for 20 hours to provide the pure product as a white solid. Yield: 101 mg (90%). HPLC analysis (Chiralcel OD-H, 10% iPrOH/hexanes, 0.80 mL/min, 254 nm; tr (major) = 15.45 min, tr (minor) = 19.28 min.) gave the isomeric composition of the product: 78.0% ee. [α]D20 = -55.2 (17.0 mg/2 mL CHCl3).

**Methyl-2–methoxycarbonyl–3–(3–indolyl)–3–phenyl propanoate (entry 2, Table 3) 3**

**(+)-enantiomer:** Prepared according to general procedure **A**: Cu(OTf)2 (10.0 mg), (S)-isopropyl-bisoxazoline **1** (7.7 mg), *i*BuOH (3.0 mL), indole (39 mg) and dimethyl benzylidene malonate (62 mg) at –25 oC for 60 hours to provide the pure product as a white solid. Yield: 75 mg (80%). HPLC analysis (Chiralcel OD-H, 15% iPrOH/hexanes, 0.75 mL/min, 254 nm; tr (minor) = 16.99 min, tr (major) = 19.65 min) gave the isomeric composition of the product: 91.94% ee. [α]D20 = + 68.8 (19.6 mg/2 mL CHCl3) 1H NMR (300 MHz, CDCl3) δ 3.52 (s, 3H), 3.56 (s, 3H), 4.31 (d, *J* = 11.7 Hz, 1H), 5.09 (d, *J* = 12.0 Hz, 1H), 7.11-7.17 (m, 3H), 7.21-7.36 (m, 5H), 7.51 (d, *J* = 7.8 Hz, 1H), 8.06 (brs, 1H).

**(-)-enantiomer:** Prepared according to general procedure **B**: Cu(OTf)2 (14.4 mg), (S)-isopropyl-bisoxazoline **1** (10.5 mg), CH2Cl2 (2.5 mL), indole (56 mg) and dimethyl benzylidene malonate (87 mg) at 0 oC for 24 hours to provide the pure product as a white solid. Yield: 93 mg (70%). HPLC analysis (Chiralcel OD-H, 15% iPrOH/hexanes, 0.70 mL/min, 254 nm; tr (major) = 16.19 min, tr (minor) = 19.62 min) gave the isomeric composition of the product: 63.0% ee. [α]D20 = -47.5 (20.9 mg/2 mL CHCl3).

**(S)–Ethyl 2–isobutoxycarbonyl–3–[3–(5-methoxyindolyl)]–3–phenylpropanoate (entry 3, Table 3)**

**(+)-enantiomer:** Prepared according to general procedure **A**: Cu(OTf)2 (11.2 mg), (*S*)–isopropyl–bisoxaozline **1** (9 mg), *i*BuOH (2.5 mL), indole (42 mg) and diisobutyl benzylidene malonate (101 mg) at –25oC for 60 hours to provide the pure product as a white solid. Yield: 61 mg (50 %). HPLC analysis (Chiralcel OD-H, 15% iPrOH/hexanes, 0.75 mL/min, 254 nm; tr (minor) = 10.01 min, tr (major) = 11.87 min.) gave the isomeric composition of the product: 96.0% ee. [α]D20 = + 53.9 (16.9 mg/2 mL CHCl3). 1H NMR (300 MHz, CDCl3): 0.71-0.78 (m, 12H), 1.70-1.76 (m, 2H), 3.71-3.75 (m, 4H), 4.32 (d, *J* = 12.0 Hz, 1H), 5.10 (d, *J* = 12.0 Hz, 1H), 7.01-7.07 (m, 1H), 7.11-7.16 (m, 2H), 7.19-7.31 (m, 4H), 7.37-7.40 (m, 2H), 7.56 (d, *J* = 7.8 Hz, 1H), 8.05 (s, br, 1H).δ13C NMR (75 MHz, CDCl3): 168.44, 168.22, 141.66, 136.46, 128.62, 128.34, 126.96, 126.82, 122.43, 121.06, 119.71, 119.57, 117.18, 111.24, 71.79, 71.76, 58.66, 43.05, 43.02, 27.73, 19.11, 19.08, 18.98, 18.92. IR (KBr): 3431, 2961, 2874, 1749, 1720, 1493, 1460, 1378, 1139, 746, 593, 424cm-1. MS (EI): 421 (M+, 22), 206 (100), 246 (33), 363 (18), 207 (23), 205 (19), 218 (10), 247 (8), 219 (6). Anal. calcd. for C26H31 N O4: C, 74.08; H, 7.41; N, 3.32. Found: C, 74.22; H, 7.52; N, 3.25.

**(-)-enantiomer:** Prepared according to general procedure **B**: Cu(OTf)2 (10.3 mg), (S)-isopropyl-bisoxazoline **1** (7.9 mg), 1,1,2,2-tetrachloroethane (2.0mL), indole (40 mg) and diisobutyl benzylidene malonate (87 mg) at 0oC for 48 hours to provide the pure product as a white solid. Yield: 35 mg (30%). HPLC analysis (Chiralcel OD-H, 15% iPrOH/hexanes, 0.70 mL/min, 254 nm; tr (major) = 10.94 min, tr (minor) =13.58 min.) gave the isomeric composition of the product: 65% ee. [α]D20 = -36.5 (20.0 mg/2 mL CHCl3).

**Ethyl 2–ethoxycarbonyl–3–(3–indolyl)–3–(p-bromophenyl) propanoate (entry 4, Table 3) 3**

**(+)-enantiomer:** Prepared according to general procedure **A:** Cu(OTf)2 (10.2 mg), (S)-isopropyl-bisoxazoline **1** (7.2 mg), *i*BuOH (4.0 mL), indole (40 mg) and diethyl *p*-bromo- benzylidene malonate (93 mg) at -25oC for 75 hours to provide the pure product as a white solid. Yield: 86 mg (68%). HPLC analysis (Chiralcel OD-H, 3% iPrOH/hexanes, 0.75 mL/min, 254 nm; tr (minor) = 80.08 min, tr (major) = 88.19 min.) gave the isomeric composition of the product: 91.5% ee. [α]D20 = + 26.0 (22.2 mg/2 mL CHCl3). 1H NMR (300 MHz, CDCl3) δ 0.97 (t, *J* = 7.2 Hz, 3H), 1.04 (t, *J* = 7.2 Hz, 3H), 3.95-4.04 (m, 4H), 4.25 (d, *J* = 11.7 Hz, 1H), 5.04 (d, *J* = 11.7 Hz, 1H), 7.02-7.05 (m, 1H), 7.05-7.12 (m, 2H), 7.21-7.27 (m, 3H), 7.32-7.35 (m, 2H), 7.48 (d, *J* = 7.5Hz, 1H), 8.22 (brs, 1H).

**(-)-enantiomer:** Prepared according to general procedure **B**: Cu(OTf)2 (10.9 mg), (*S*)–isopropyl–trisoxazoline **2a** (8.0 mg), dichloromethane (3.0mL), indole (45 mg) and diethyl *p*-bromobenzylidene malonate (98 mg) at 0oC for 24 hours to provide the pure product as a white solid. Yield: 88 mg (65%). HPLC analysis (Chiralcel OD-H, 4% iPrOH/hexanes, 0.80 mL/min, 254 nm; tr (major) = 48.33 min, tr (minor) = 56.80 min.) gave the isomeric composition of the product: 78.0% ee. [α]D20 = -20.8.1 (22.5 mg/2 mL CHCl3).

**Ethyl 2–ethoxycarbonyl–3–(3–indolyl)–3–(o-chlorophenyl) propanoate (entry 5, Table 3) 3**

**(+)-enantiomer:**Prepared according to general procedure **A**: Cu(OTf)2 (10.1 mg), (S)-isopropyl-bisoxazoline **1** (8.0 mg), *i*BuOH (4.0 mL), indole (39 mg) and diethyl *o*-chlorobenzylidene malonate (79 mg) at –25 oC for 75 hours to provide the pure product as a white solid. Yield: 62 mg (56%). HPLC analysis (Chiralcel OD-H, 15% iPrOH/hexanes, 0.70 mL/min, 254 nm; tr (minor) = 13.5 min, tr (major) = 19.01 min.) gave the isomeric composition of the product: 97.3% ee. [α]D20 = + 46.3 (20.1 mg/2 mL CHCl3) 1H NMR (300 MHz, CDCl3) δ 0.92 (t, *J* = 6.9, 7.2 Hz, 3H), 1.00 (t, *J* = 6.9, 7.2 Hz, 3H), 3.94 (q, *J* = 6.9, 7.2 Hz, 2H), 4.00 (q, *J* = 6.9, 7.2 Hz, 2H), 4.41 (d, *J* = 11.7 Hz, 1H), 5.67 (d, *J* = 11.7 Hz, 1H), 7.01-7.12 (m, 5H), 7.20 (m, 1H), 7.30 (dd, *J* = 0.9, 7.5 Hz, 1H), 7.38 (dd, *J* = 1.2, 7.5Hz, 1H), 7.69 (d, *J* = 7.5 Hz, 1H), 8.27 (brs, 1H).

**(-)-enantiomer:** Prepared according to general procedure **B**: Cu(OTf)2 (7.1 mg), (S)-isopropyl-bisoxazoline **1** (4.9 mg), 1,1,2,2-tetrachloroethane (2.0mL), indole (26 mg) and diethyl *o*-chlorobenzylidene malonate (55 mg) at 0 oC for 48 hours to provide the pure product as a white solid. Yield: 22 mg (30%). HPLC analysis (Chiralcel OD-H, 10% iPrOH/hexanes, 0.80 mL/min, 254 nm; tr (major) = 15.42 min, tr (minor) = 23.88 min.) gave the isomeric composition of the product: 71% ee. [α]D20 = -36.8 (29.8 mg/2 mL CHCl3).

**Ethyl 2–ethoxycarbonyl–3–(3–indolyl)–3–(p-nitrophenyl) propanoate (entry 6, Table 3)** 3

**(+)-enantiomer:** Prepared according to general procedure **A:** Cu(OTf)2 (6.6 mg), (*S*)–isopropyl–bisoxazoline **1** (5.7 mg), *i*BuOH (4.0 mL), indole (25 mg) and diethyl *p*-nitrobenzylidene malonate (54 mg) at 0oC for 48 hours to provide the pure product as a pale yellow solid. Yield: 71 mg (94%). HPLC analysis (Chiralpak AS, 10% iPrOH/hexanes, 1.00 mL/min, 254 nm; tr (major) = 28.51 min, tr (minor) = 37.95 min) gave the isomeric composition of the product: 83.0% ee. [α]D20 = + 4.0 (15.6 mg/2 mL CHCl3). 1H NMR (300 MHz, CDCl3), δ 1.00 (t, *J* = 7.2 Hz, 3H), 1.06 (t, *J* = 7.2 Hz, 3H), 4.03 (q, *J* = 7.2 Hz, 4H), 4.32 (d, *J* = 11.7 Hz, 1H), 5.20 (d, *J* = 11.7 Hz, 1H), 7.05 (t, *J* = 7.2 Hz, 1H), 7.16-7.22 (m, 2H), 7.30-7.33 (d, *J* = 8.1 Hz, 1H) 7.47 (d, *J* = 8.1 Hz, 1H), 7.54 (d, *J* = 8.4 Hz, 2H), 8.10 (d, *J* = 8.7 Hz, 2H), 8.20 (brs, 1H).

**(-)-enantiomer:** Prepared according to general procedure **B**: Cu(OTf)2 (8.5 mg), (*S*)–isopropyl–bisoxazoline **1** (6.5 mg), 1,1,2,2-tetrachloroethane (2.0mL), indole (33 mg) and diethyl *p*-nitrobenzylidene malonate (69 mg) at 0oC for 48 hours to provide the pure product as a pale yellow solid. Yield: 85 mg (88%). HPLC analysis (Chiralpak AS, 10% iPrOH/hexanes, 1.00 mL/min, 254 nm; tr (minor) = 32.17 min, tr (major) = 38.62 min) gave the isomeric composition of the product: 70.0% ee. [α]D20 = -3.1 (18.0 mg/2 mL CHCl3).

**Ethyl 2–ethoxycarbonyl–3–[3–(5-methylindolyl)]–3–phenylpropanoate (entry 7, Table 3)** 3

**(+)-enantiomer:** Prepared according to general procedure **A**: Cu(OTf)2 (9.2 mg), (S)-isopropyl-bisoxazoline **1** (7.1 mg), *i*BuOH (5.0 mL), 5-methylindole (38 mg) and diethyl benzylidene malonate (62 mg) at -25oC for 90 hours to provide the pure product as a white solid. Yield: 73 mg (70%). HPLC analysis (Chiralcel OD-H, 15% iPrOH/hexanes, 0.70 mL/min, 254 nm; tr (minor) = 11.52 min, tr (major) = 13.80 min.) gave the isomeric composition of the product: 91.0% ee. [α]D20 = + 41.6 (18.4 mg/2 mL CH2Cl2). 1H NMR (300 MHz, CDCl3): δ 1.00 (m, 6H), 2.38 (s, 3H), 3.98 (m, 4H), 4.27 (d, *J* = 12.3Hz, 1H), 5.04 (d, *J* = 11.7 Hz, 1H), 6.95 (m, 1H), 7.11-7.25 (m, 5H), 7.33-7.38 (m, 3H), 7.96 (brs, 1H).

**(-)-enantiomer:** Prepared according to general procedure **B**: Cu(OTf)2 (8.6 mg), (S)-isopropyl-bisoxazoline **1** (6.1 mg), TTCE (2.0 mL), 5-methylindole (38 mg) and diethyl benzylidene malonate (60 mg) at 0oC for 28 hours to provide the pure product as a white solid. Yield: 57 mg (62%). HPLC analysis (Chiralcel OD-H, 15% iPrOH/hexanes, 0.70 mL/min, 254 nm; tr (major) = 13.16 min, tr (minor) = 16.35 min.) gave the isomeric composition of the product: 75.0% ee. [α]D20 = -32.0 (14.5 mg/2 mL CH2Cl2).

**(S)–Ethyl 2–ethoxycarbonyl–3–[3–(5-methoxyindolyl)]–3–phenylpropanoate (entry 8, Table 3) 3**

**(+)-enantiomer:** Prepared according to general procedure **A**: Cu(OTf)2 (12.4 mg), (S)-isopropyl-bisoxazoline **1** (9.1 mg), *i*BuOH (2.5 mL), 5-methoxyindole (60 mg) and diethyl benzylidene malonate (85 mg) at –25oC for 60 hours to provide the pure product as a white solid. Yield: 94 mg (70%). HPLC analysis (Chiralcel OD-H, 15% iPrOH/hexanes, 0.70 mL/min, 254 nm; tr (minor) = 15.24 min, tr (major) = 18.70 min.) gave the isomeric composition of the product: 94.1% ee. [α]D20 = + 10.3 (26.2 mg/2 mL CHCl3). 1H NMR (300 MHz, CDCl3) δ 0.97-1.02 (m, 6H), 3.77 (s, 3H), 3.94-4.05 (m, 4H), 4.26 (d, *J* = 11.7 Hz, 1H), 5.02 (d, *J* = 11.7 Hz, 1H), 6.78 (dd, *J* = 2.4, 5.7 Hz, 1H), 6.96 (d, *J* = 2.4 Hz, 1H), 7.11-7.17 (m, 3H), 7.20-7.25 (m, 2H), 7.37-7.38 (m, 2H), 7.99 (brs, 1H).

**(-)-enantiomer:** Prepared according to general procedure **B**: Cu(OTf)2 (11.0 mg), (S)-isopropyl-bisoxazoline 1 (7.8 mg), 1,1,2,2-tetrachloroethane (3 mL), 5-methoxy- indole (43 mg) and diethyl benzylidene malonate (74 mg) at 0oC for 22 hours to provide the pure product as a white solid. Yield: 67 mg (58%). HPLC analysis (Chiralcel OD-H, 15% iPrOH/hexanes, 0.70 mL/min, 254 nm; tr (major) = 14.88 min, tr (minor) =19.09 min.) gave the isomeric composition of the product: 62% ee. [α]D20 = -7.2 (16.5 mg/2 mL CHCl3).

References:

1. S. Bellemin Laponnaz, L. H. Gade, *Angew. Chem., Int. Ed.,* **2002**, *41*, 3473.
2. S. E. Denmark, C. M. Stiff, *J. Org. Chem.,* **2000**, *65, 5875*.
3. J. Zhou, Y. Tang, *J. Am. Chem. Soc*., **2002**, *124*, 9030.
